# Supplementary material for: ERα Mediates Estrogen-Induced Expression of the Breast Cancer Metastasis Suppressor Gene BRMS1
Source: MDPI journal article supplement (doi:10.3390/ijms17020158), 2016-01-26
Supplement: s1 [file s1]

# Supplementary Materials: ER $\alpha$ Mediates Estrogen-Induced Expression of the Breast Cancer Metastasis Suppressor Gene BRMS1

Hongtao Ma and Lauren S. Gollahon

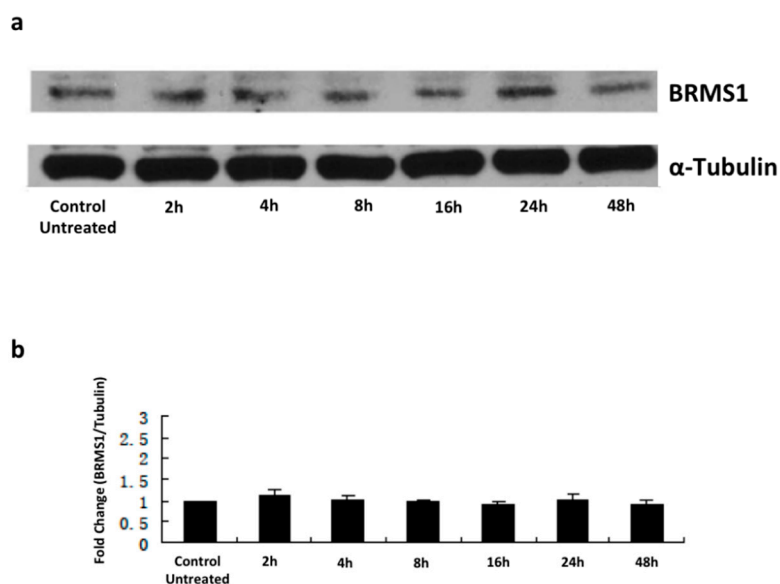

**Figure S1.** Western analysis of effects of DMSO treatment on BRMS1 protein expression in MCF-7 cells. (a) Cells were untreated or incubated with culture media containing 10 nM DMSO for 2, 4, 8, 16, 24, and 48 h. At each time interval, cells were harvested and 20  $\mu$ g of the total protein was loaded for each sample to determine BRMS1 expression by Western blot.  $\alpha$ -tubulin was used as the loading control. Each band present was quantified using Image J and a set area encompassing the BRMS1 band was divided by the same area for  $\alpha$ -tubulin from the same lane to determine the relative amount of BRMS1 expression. The control untreated cell extract result value was set to 1 for comparisons; (b) The bar graph summarizes BRMS1 protein normalized to  $\alpha$ -tubulin from the same lane in three independent experiments. Error bars were the average of three independent experiments  $\pm$  SD. No significant difference was observed from control. Therefore DMSO controls were treated for 2 hours for subsequent experiments.

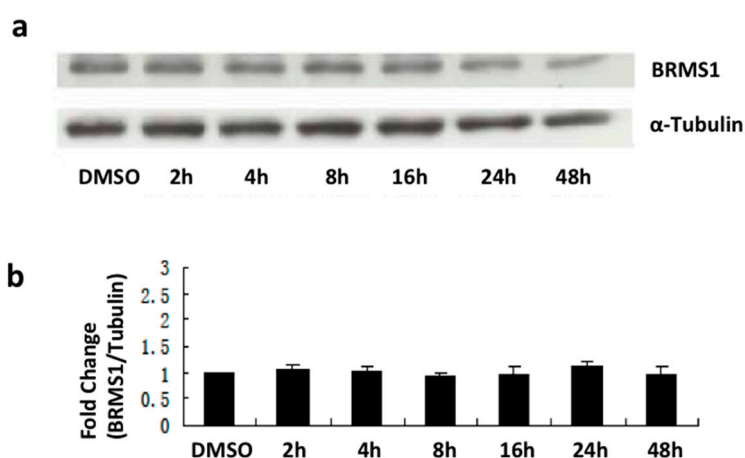

**Figure S2.** Cont.

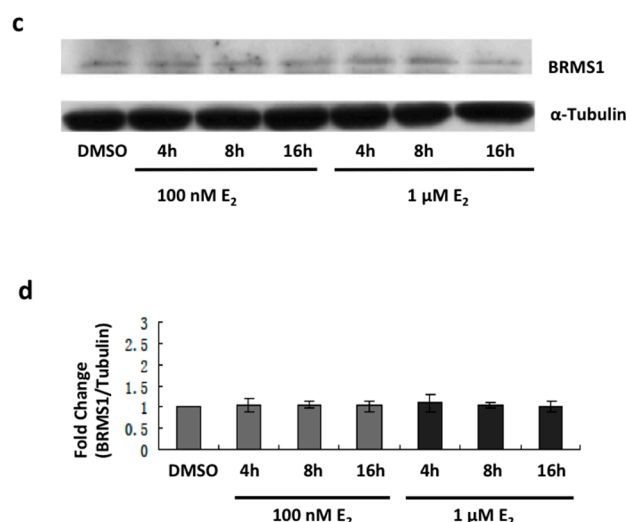

**Figure S2.** Western blot analysis of BRMS1 protein expression induced by different concentrations of E<sub>2</sub> in TTU-1 cells. (a) TTU-1 cells incubated with culture media containing 10 nM E<sub>2</sub> for 2, 4, 8, 16, 24, and 48 h; (b) Bar graph summarizes BRMS1 protein normalized to α-tubulin from the same lane from three independent experiments from conditions described in (a); (c) TTU-1 cells incubated with culture media containing 100 nM E<sub>2</sub> or 1 μM for 4, 8 or 16 h. Control cells were incubated with culture media containing 10 nM DMSO for 2 h. samples were quantified as previously described; (d) Bar graph summarizes BRMS1 protein normalized to α-tubulin from the same lane from three independent experiments from conditions described in (c). Error bars represent the average of three independent experiments ± SD. No significant difference was observed from control.

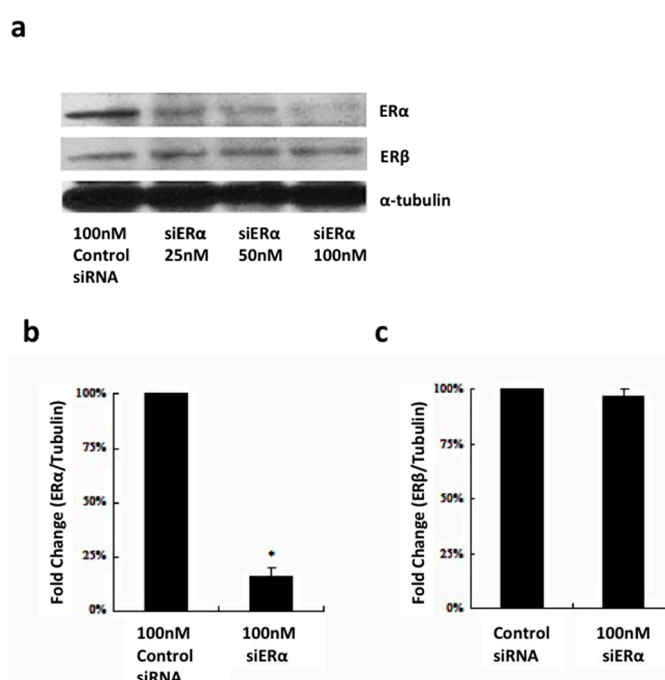

**Figure S3.** Western blot analysis of ERα and ERβ expression in MCF-7 cells transfected with 25, 50, and 100 nM siRNA against ERα or 100 nM negative control siRNA-A for 48 h. (a) Western blot showed protein expression from whole cell extract. α-tubulin was used as the loading control; The bar graphs summarize ERα (b) and ERβ (c) protein normalized to α-tubulin from the same lane from three independent experiments. Values with error bars were the average of three independent experiments ± SD. \* indicates statistical significance at the  $p < 0.05$  compared to DMSO. Each lane was loaded with 40 μg whole cell extract.
